# Supplementary material
Source: PubMed Central journal article supplement (PMC2566936)
Supplement: NIHMS62953-supplement-1si20060505_07.pdf [file NIHMS62953-supplement-1si20060505_07.pdf]

Supplementary Table 2. Complete list of differentially expressed proteins in response to viral infection between 0 and 8 hours.

| Accession Number                                                     | Protein Name                                                            | Average Ratio<br>$I_{8\text{hours}}/I_{0\text{hours}}$ |
|----------------------------------------------------------------------|-------------------------------------------------------------------------|--------------------------------------------------------|
| <b>Up Regulated Proteins in FHV-infected <i>Drosophila</i> Cells</b> |                                                                         |                                                        |
| Q9VM33                                                               | Probable elongation factor G, mitochondrial precursor (mEF-G)           | 157.2                                                  |
| P30189                                                               | DNA topoisomerase I (EC 5.99.1.2)                                       | 54.6                                                   |
| Q9W089                                                               | CG13933-PA (LD18443p)                                                   | 43.1                                                   |
| Q9VQV1                                                               | CG3921-PA                                                               | 39.0                                                   |
| Q9VKZ2                                                               | CG5375-PA                                                               | 38.4                                                   |
| P02516                                                               | Heat shock protein 23                                                   | 33.8                                                   |
| Q9VC06                                                               | CG11771-PA (LD37516p) (SD01727p)                                        | 22.1                                                   |
| Q9V4S5                                                               | CG11641-PA (AT16994p)                                                   | 20.0                                                   |
| Q9V3I5                                                               | CG6297-PA, isoform A (Cg6297-pb, isoform b) (Protein kinase JIL-1)      | 15.7                                                   |
| Q9VJ28                                                               | CG10639-PA                                                              | 15.3                                                   |
| Q7PL92                                                               | CG40001-PA.3                                                            | 14.2                                                   |
| Q9VX88                                                               | CG8949-PA                                                               | 12.7                                                   |
| Q9VT65                                                               | CG8107-PA                                                               | 12.7                                                   |
| Q9VUC1                                                               | CG6603-PA, isoform A (Cg6603-pb, isoform b) (LD32979p)                  | 9.0                                                    |
| Q9VNP1                                                               | CG32458-PA                                                              | 8.9                                                    |
| P00967                                                               | Trifunctional purine biosynthetic protein adenosine-3                   | 8.4                                                    |
| Q9XZ19                                                               | CG3909-PA (Hypothetical protein)                                        | 8.3                                                    |
| Q9VZS7                                                               | CG14967-PA                                                              | 8.1                                                    |
| Q9V9U4                                                               | CG2245-PA (LD09536p)                                                    | 7.9                                                    |
| P10379                                                               | Unzipped protein precursor (Zipper protein)                             | 7.6                                                    |
| Q00174                                                               | Laminin alpha chain precursor                                           | 6.6                                                    |
| Q8IR23                                                               | CG9209-PA, isoform A (Cg9209-pb, isoform b) (RasGap protein)            | 6.3                                                    |
| Q9VAC1                                                               | CG7920-PA, isoform A (GM14349p)                                         | 6.0                                                    |
| Q9VWV8                                                               | CG6179-PA                                                               | 6.0                                                    |
| Q9VYD7                                                               | Mitochondrial import inner membrane translocase subunit Tim9A           | 5.9                                                    |
| Q9VW22                                                               | CG8793-PA                                                               | 5.5                                                    |
| Q9W0H4                                                               | CG2469-PA, isoform A (Cg2469-pb, isoform b) (LD24034p)                  | 5.3                                                    |
| Q9VYZ2                                                               | Putative gustatory receptor 10b                                         | 5.0                                                    |
| Q9VQ96                                                               | CG4267-PA (RH13166p)                                                    | 4.5                                                    |
| Q95029                                                               | Cathepsin L precursor (EC 3.4.22.15) (Cysteine proteinase 1)            | 4.2                                                    |
| Q9VFN3                                                               | CG12402-PA                                                              | 4.0                                                    |
| Q9XZ68                                                               | CG18627-PA (Geranylgeranyl transferase type II beta-subunit) (GH25366p) | 3.8                                                    |
| Q9VUL4                                                               | CG16959-PA, isoform A (Cg16959-pb, isoform b) (GH11627p)                | 3.8                                                    |
| Q9VI16                                                               | CG1041-PA                                                               | 3.7                                                    |
| Q24572                                                               | Chromatin assembly factor 1 P55 subunit                                 | 3.7                                                    |
| Q24208                                                               | Eukaryotic translation initiation factor 2 gamma subunit                | 3.7                                                    |
| Q8MZI3                                                               | GH10652p (CG10077-PA, isoform A)                                        | 3.6                                                    |
| P52304                                                               | Serine/threonine-protein kinase polo (EC 2.7.1.37)                      | 3.5                                                    |
| Q9VHV7                                                               | CG7878-PA (LD33749p)                                                    | 3.4                                                    |
| Q9VL75                                                               | CG4539-PA (RE14259p) (RE14949p)                                         | 3.3                                                    |
| Q9VZF6                                                               | CG14997-PA, isoform A (Cg14997-pb, isoform b) (GH04863p)                | 3.3                                                    |

---

|        |                                                                                |     |
|--------|--------------------------------------------------------------------------------|-----|
| Q9VYQ8 | CG1490-PB                                                                      | 3.3 |
| Q9V3U2 | CG5258-PA (Nucleolar protein NHP2)                                             | 3.0 |
| Q9VLT1 | CG31756-PA                                                                     | 3.0 |
| Q9V9N4 | CG1832-PA (SD16766p)                                                           | 2.9 |
| Q9VMU6 | CG31918-PA (LD31822p)                                                          | 2.9 |
| Q9VL60 | CG13126-PA (RE01590p)                                                          | 2.9 |
| Q9VI23 | CG9727-PA (LD40317p)                                                           | 2.8 |
| P37276 | Dynein heavy chain, cytosolic (DYHC)                                           | 2.8 |
| P07665 | Serendipity locus beta protein                                                 | 2.8 |
| Q9VGF7 | CG18347-PA (SD15982p)                                                          | 2.8 |
| P13395 | Spectrin alpha chain                                                           | 2.8 |
| Q9VXE6 | CG4453-PA                                                                      | 2.8 |
| Q9V784 | SAM50-like protein CG7639                                                      | 2.8 |
| P13060 | Elongation factor 2 (EF-2)                                                     | 2.7 |
| P40793 | Cdc42 homolog                                                                  | 2.6 |
| Q8I8U7 | Transcription-associated protein 1 (dTRA1)                                     | 2.6 |
| Q9VZX7 | CG1241-PA (LP21012p)                                                           | 2.6 |
| Q9VZX9 | CG9977-PA                                                                      | 2.5 |
| Q9VZE4 | CG1316-PA (RE70333p)                                                           | 2.5 |
| Q9V531 | CG8078-PA (LD03161p)                                                           | 2.4 |
| Q9VMX1 | CG14043-PA                                                                     | 2.4 |
| Q9XYZ7 | CG8230-PA (Hypothetical protein)                                               | 2.4 |
| Q9V8D5 | CG10916-PA (LD46221p)                                                          | 2.4 |
| Q9W2E7 | CG9862-PA                                                                      | 2.3 |
| Q9VNH5 | CG2091-PA (GH04919p)                                                           | 2.3 |
| Q9VXB4 | CG9609-PA (LD35155p)                                                           | 2.3 |
| Q9VNA3 | CG11999-PA (GH21273p)                                                          | 2.3 |
| Q9V773 | Probable cytochrome P450 6a20                                                  | 2.3 |
| Q9V710 | CG12505-PA (LD41905p)                                                          | 2.3 |
| Q9VJZ4 | CG9306-PA (AT12494p)                                                           | 2.3 |
| P23573 | Cell division control protein 2 cognate (EC 2.7.1.37)                          | 2.3 |
| Q9I7K4 | CG18542-PA (CG32939-PA) (LD18367p)                                             | 2.3 |
| Q9VIU7 | Probable dolichol-phosphate mannosyltransferase (EC 2.4.1.83)                  | 2.3 |
| Q9VT61 | CG8108-PA, isoform A (Cg8108-pb, isoform b)                                    | 2.2 |
| Q7KRL2 | CG11200-PA, isoform A (Cg11200-pb, isoform b) (GH19857p)                       | 2.2 |
| P25822 | Maternal pumilio protein                                                       | 2.2 |
| Q960B1 | SD10334p                                                                       | 2.2 |
| Q9VW58 | CG8004-PA (LD33138p)                                                           | 2.2 |
| Q9VPD2 | CG4858-PA (LP21185p)                                                           | 2.2 |
| P02518 | Heat shock protein 27                                                          | 2.2 |
| Q9Y1A3 | Mitochondrial import inner membrane translocase subunit Tim8                   | 2.2 |
| P10987 | Actin-5C                                                                       | 2.2 |
| Q9V603 | CG9006-PA (LP02372p)                                                           | 2.2 |
| Q7PLL6 | CG17514-PA.3                                                                   | 2.2 |
| Q9XZU1 | Importin-alpha re-exporter (Cellular apoptosis susceptibility protein homolog) | 2.2 |
| P49735 | DNA replication licensing factor MCM2                                          | 2.1 |
| O61231 | 60S ribosomal protein L10 (QM protein homolog) (dQM)                           | 2.1 |
| Q9W1V7 | CG9890-PA (LD46465p)                                                           | 2.1 |
| Q9VHA0 | Polycomb protein Scm (Sex comb on midleg protein)                              | 2.1 |
| Q9VM17 | CG5181-PA (LD31278p)                                                           | 2.1 |

---

|        |                                                                                |     |
|--------|--------------------------------------------------------------------------------|-----|
| Q9VG79 | CG5663-PA (LD07362p)                                                           | 2.1 |
| Q9VWG0 | CG33075-PA, isoform A (Cg33075-pc, isoform c) (GH21048p)                       | 2.1 |
| Q9VEB4 | CG7175-PA (LD08952p)                                                           | 2.1 |
| Q9W124 | CG4806-PA                                                                      | 2.0 |
| Q9VTB0 | CG8003-PA (LD35289p)                                                           | 2.0 |
| Q9VKM7 | CG33129-PE, isoform E (AT01533p)                                               | 2.0 |
| Q9V383 | CG33087-PC                                                                     | 2.0 |
| P08111 | Lethal(2) giant larvae protein                                                 | 2.0 |
| Q27367 | Croquemort protein (d-CD36)                                                    | 2.0 |
| Q9V9S8 | Ferrochelatase, mitochondrial precursor (EC 4.99.1.1)                          | 2.0 |
| Q9I7D3 | CG18811-PA (LP14942p)                                                          | 2.0 |
| Q9VUX2 | CG5841-PA (SD05267p)                                                           | 2.0 |
| Q95028 | L-lactate dehydrogenase (EC 1.1.1.27) (LDH)                                    | 2.0 |
| Q9V8H9 | CG30118-PA (GH11472p)                                                          | 2.0 |
| Q9V7H1 | CG8315-PA (RE39562p)                                                           | 2.0 |
| Q9V3K7 | CG3793-PA (BG:DS09217.4 protein) (GH21948p)                                    | 2.0 |
| Q9VTZ5 | CG10620-PA (LD22449p)                                                          | 2.0 |
| Q9VX98 | CG9099-PA (GH20858p)                                                           | 2.0 |
| P36958 | DNA-directed RNA polymerase II 15.1 kDa polypeptide (EC 2.7.7.6)               | 2.0 |
| P41126 | 60S ribosomal protein L13 (BBC1 protein homolog)                               | 2.0 |
| Q9V9B6 | CG9422-PA, isoform A (Cg9422-pc, isoform c)                                    | 2.0 |
| Q8SYL1 | RE55020p (CG12792-PA) (RE17371p)                                               | 2.0 |
| Q9V4C8 | Host cell factor (dHcf) [Contains: HCF N-terminal chain; HCF C-terminal chain] | 1.9 |
| Q9VJ14 | CG17492-PA (LD11955p)                                                          | 1.9 |
| Q9VE75 | CG18617-PA, isoform A (Cg18617-pb, isoform b) (Hypothetical protein)           | 1.9 |
| Q9V3U6 | CG8947-PA (Homologue of Sarcophaga 26,29kDa proteinase) (RE18380p)             | 1.9 |
| Q960C7 | SD07613p                                                                       | 1.9 |
| Q24133 | DnaJ protein homolog 1 (DROJ1)                                                 | 1.9 |
| Q9V6F0 | CG8778-PA                                                                      | 1.9 |
| Q9V5M0 | CG11761-PA (GM27569p)                                                          | 1.9 |
| Q9VZ34 | CG2076-PA (RH72958p)                                                           | 1.9 |
| Q9V6M3 | CG4670-PA (RE62692p)                                                           | 1.8 |
| Q9W379 | CG9060-PA (LD37736p)                                                           | 1.8 |
| Q9VYV3 | CG1837-PA (LD24756p)                                                           | 1.8 |
| Q9VXK7 | CG9172-PA, isoform A (Cg9172-pb, isoform b) (LD31474p)                         | 1.8 |
| Q9V9X4 | CG11334-PA, isoform A                                                          | 1.8 |
| Q9V3T8 | SR family splicing factor SC35 (CG5442-PB, isoform B) (LD32469p)               | 1.8 |
| Q9VMU0 | CG8680-PA (LP20380p)                                                           | 1.8 |
| P20028 | DNA-directed RNA polymerase I 135 kDa polypeptide                              | 1.8 |
| Q9Y125 | CG12070-PA, isoform A (BcDNA.GH08312)                                          | 1.8 |
| Q9VMM5 | CG9171-PA, isoform A (Cg9171-pb, isoform b) (RE67001p)                         | 1.8 |
| P32234 | GTP-binding protein 128UP                                                      | 1.8 |
| O44386 | Integrin alpha-PS3 precursor                                                   | 1.8 |
| P48810 | Heterogeneous nuclear ribonucleoprotein 87F                                    | 1.8 |
| P41094 | 40S ribosomal protein S18                                                      | 1.8 |
| Q9VF53 | CG18522-PA (LD37006p)                                                          | 1.7 |
| Q9V6I1 | CG13319-PA (GH19585p)                                                          | 1.7 |
| Q9VD22 | CG18596-PA (LP02352p)                                                          | 1.7 |
| P26019 | DNA polymerase alpha catalytic subunit (EC 2.7.7.7)                            | 1.7 |

---

|        |                                                            |     |
|--------|------------------------------------------------------------|-----|
| Q9VDR1 | CG12254-PA (LD07688p)                                      | 1.7 |
| Q9VC40 | CG5805-PA (GH22160p)                                       | 1.7 |
| Q24260 | CG10159-PA, isoform A (Boundary element associated factor) | 1.7 |
| Q9VQR2 | CG8844-PA, isoform A                                       | 1.7 |
| Q9VP57 | CG7752-PA (LD15904p)                                       | 1.7 |
| Q9VTZ4 | CG10627-PA (LD02044p)                                      | 1.7 |
| Q9W2Y4 | CG2972-PA (LD17927p)                                       | 1.7 |
| Q9VII9 | CG31673-PA (LD14730p)                                      | 1.7 |
| Q9V4U9 | Probable cytochrome P450 6a13                              | 1.7 |
| Q9VHB6 | Metaxin 1 homolog                                          | 1.7 |

### Underexpressed Proteins in FHV-infected *Drosophila* Cells

|        |                                                                                          |     |
|--------|------------------------------------------------------------------------------------------|-----|
| Q9V405 | CG16916-PA (26S proteasome regulatory complex subunit p48A)                              | 0.6 |
| O46037 | Vinculin                                                                                 | 0.6 |
| Q9VHL1 | CG9839-PA (LD40589p)                                                                     | 0.6 |
| Q9VTU3 | CG6811-PA (LD02491p)                                                                     | 0.6 |
| Q94901 | CG8597-PA, isoform A (Cg8597-pb, isoform b) (LD40792p) (RNA-binding protein lark)        | 0.6 |
| Q9VM59 | CG9200-PA (LD21610p)                                                                     | 0.6 |
| Q9VQ75 | CG4259-PA (SD22430p)                                                                     | 0.6 |
| Q9W0I6 | CG9128-PA (GH08349p)                                                                     | 0.6 |
| Q9VG04 | CG8031-PA (LP04475p)                                                                     | 0.6 |
| Q9VQ54 | CG7337-PA (LD01189p)                                                                     | 0.6 |
| Q9XZ17 | CG7686-PA (Hypothetical protein)                                                         | 0.6 |
| Q94535 | Splicing factor U2af 38 kDa subunit                                                      | 0.6 |
| O96840 | CG5788-PA (Ubiquitin-conjugating enzyme) (EC 6.3.2.19) (EG:52C10.4 protein) (RE47264p)   | 0.6 |
| P17719 | Dihydrofolate reductase (EC 1.5.1.3)                                                     | 0.6 |
| P48601 | 26S protease regulatory subunit 4 (P26s4)                                                | 0.6 |
| Q9VSR7 | CG5660-PA (RE41093p)                                                                     | 0.6 |
| Q9V841 | CG4903-PA                                                                                | 0.6 |
| Q8MKM9 | CG30496-PA (RE73310p)                                                                    | 0.6 |
| Q9V8D8 | CG5721-PA (SD05591p)                                                                     | 0.6 |
| Q9W1X4 | Nuclear pore complex protein Nup214 (Nucleoporin Nup214) (214 kDa nucleoporin) (DNup214) | 0.6 |
| P18490 | Pecanex protein                                                                          | 0.5 |
| Q9VAN7 | CG1721-PA (GH13304p)                                                                     | 0.5 |
| Q7KNS3 | Lissencephaly-1 homolog (Lissencephaly1) (Dlis1) (DLis-1)                                | 0.5 |
| Q9W3X8 | CG3198-PA (RH42690p)                                                                     | 0.5 |
| P29845 | Heat shock 70 kDa protein cognate 5                                                      | 0.5 |
| Q9V915 | CG9143-PA (LD11580p)                                                                     | 0.5 |
| Q9VNH6 | Probable exocyst complex component Sec8                                                  | 0.5 |
| Q9V393 | CG1487-PA (Kurtz arrestin) (LD31082p)                                                    | 0.5 |
| Q8SXU3 | RE21160p (CG8207-PA)                                                                     | 0.5 |
| Q9VL00 | Ubiquitin thiolesterase otubain-like protein                                             | 0.5 |
| Q9TVQ5 | Chromatin protein SPT4 (CG12372-PA) (LD44495p)                                           | 0.5 |
| P46824 | Kinesin light chain (KLC)                                                                | 0.5 |
| Q9V7E3 | CG33139-PA (Ran binding protein 11) (LD41918p)                                           | 0.5 |
| O97365 | BM-40 precursor (CG6378-PA)                                                              | 0.5 |
| Q9VVL5 | CG5567-PA                                                                                | 0.5 |

---

|        |                                                                           |      |
|--------|---------------------------------------------------------------------------|------|
| Q9VNX8 | CG7414-PA (LD24903p)                                                      | 0.5  |
| Q8I0K8 | CG31770-PB (Hemocyte-specific protein HEMESE)                             | 0.4  |
| Q8IH24 | Mediator complex subunit TRAP18 (Protein SOH1) (dSOH1)                    | 0.4  |
| Q9U3V9 | Xmas-2 protein                                                            | 0.4  |
| Q9W1H5 | CG11183-PA                                                                | 0.4  |
| Q9VZZ6 | CG16985-PA (RE30174p)                                                     | 0.4  |
| Q9VAG9 | CG7789-PA (LD34542p)                                                      | 0.4  |
| Q9V662 | CG12367-PA (LD04449p)                                                     | 0.4  |
| Q9V3T9 | NADPH:adrenodoxin oxidoreductase, mitochondrial precursor                 | 0.4  |
| Q9V7H5 | CG8386-PA (LD28985p)                                                      | 0.4  |
| Q95RB1 | LD46870p (CG14641-PA)                                                     | 0.4  |
| Q9VW11 | CG3291-PA (LD22664p)                                                      | 0.4  |
| P50535 | Male-specific lethal-1 protein                                            | 0.4  |
| Q9VF26 | CG3158-PA                                                                 | 0.4  |
| Q95RG8 | LD30319p (CG16728-PA)                                                     | 0.4  |
| Q24306 | Apoptosis 1 inhibitor (Inhibitor of apoptosis 1) (dIAP1) (Thread protein) | 0.3  |
| Q9VNB2 | CG1172-PA (RE42193p)                                                      | 0.3  |
| Q9V498 | Calsyntenin-1 precursor                                                   | 0.3  |
| Q9VJI7 | CG13277-PA (RH73529p)                                                     | 0.3  |
| Q9VYD5 | CG1673-PA (RE68592p)                                                      | 0.3  |
| Q9VBS0 | CG10675-PA (GH14673p)                                                     | 0.3  |
| Q8IPS5 | CG32462-PA (AT05186p)                                                     | 0.2  |
| O77263 | Probable tRNA (guanine-N(7)-)-methyltransferase                           | 0.2  |
| Q7KRY7 | LAP4 protein (Scribble protein) (Smell-impaired protein)                  | 0.2  |
| Q9VRV6 | CG7386-PA                                                                 | 0.2  |
| Q9VEY9 | CG4979-PA (GH15759p)                                                      | 0.2  |
| Q9W406 | CG15894-PA                                                                | 0.2  |
| Q9VS55 | CG8591-PA (GH14774p)                                                      | 0.2  |
| Q9VUU9 | CG32150-PA, isoform A                                                     | 0.2  |
| Q9V8N1 | CG15096-PA, isoform A                                                     | 0.1  |
| Q9GP60 | Pol protein                                                               | 0.01 |
